# Supplementary material
Source: PubMed Central journal article supplement (PMC7703809)
Supplement: NIHMS1621665-supplement-supp_info.pdf [file NIHMS1621665-supplement-supp_info.pdf]

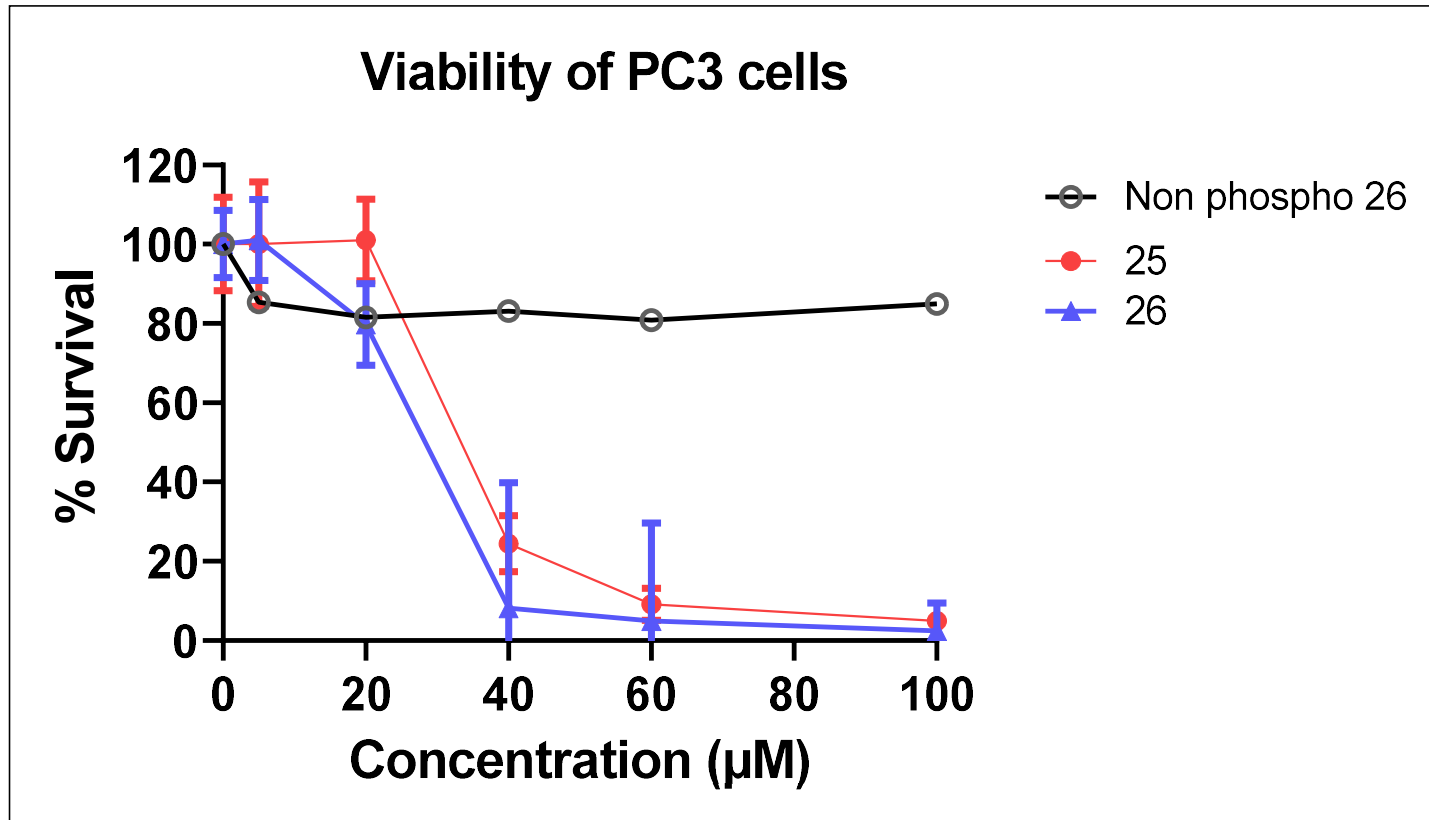

**Supplemental Figure 1.** Anti-proliferative activity of FLIPs

# Determination of melting profile of PLK1

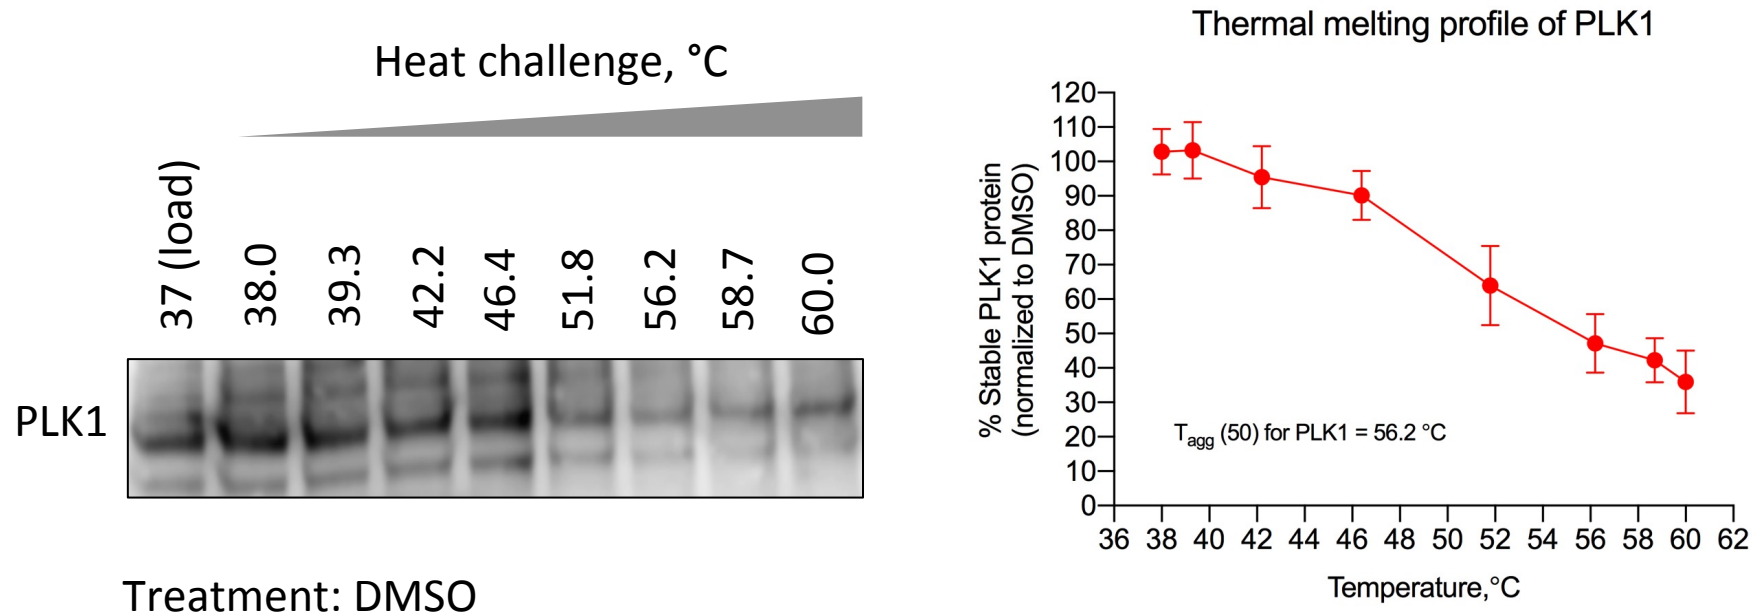

Dose-response measurements with inhibitors were done at  $T_{agg}(50)$

**Supplemental Figure 2.** Cellular Thermal Stability of PLK1

# Determination of melting profile of PLK3

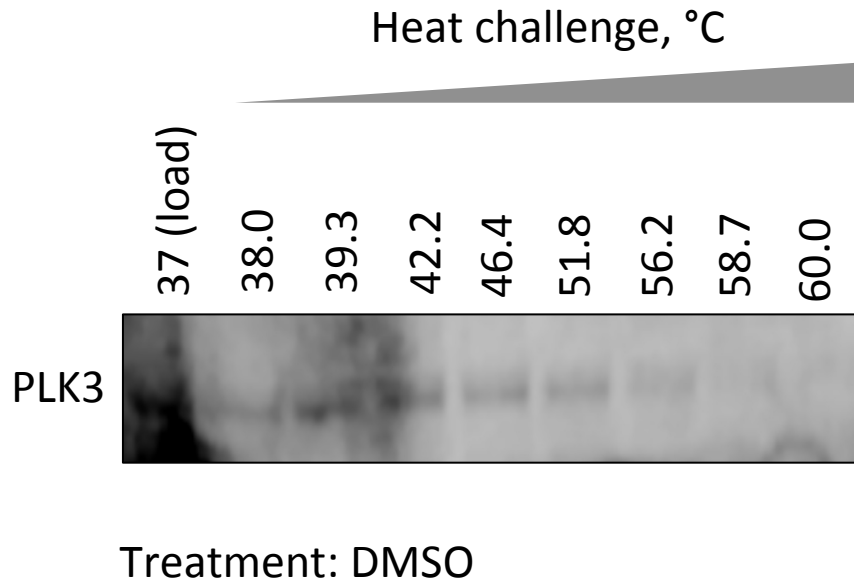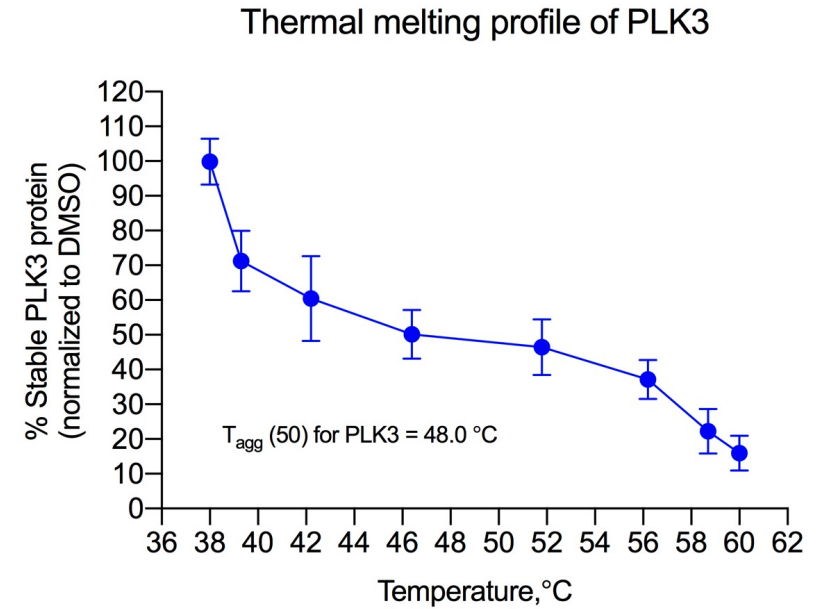

Dose-response measurements with inhibitors were done at  $T_{agg}(50)$

**Supplemental Figure 3.** Cellular Thermal Stability of PLK3

# Dose-dependent engagement of PLK1 inhibitors

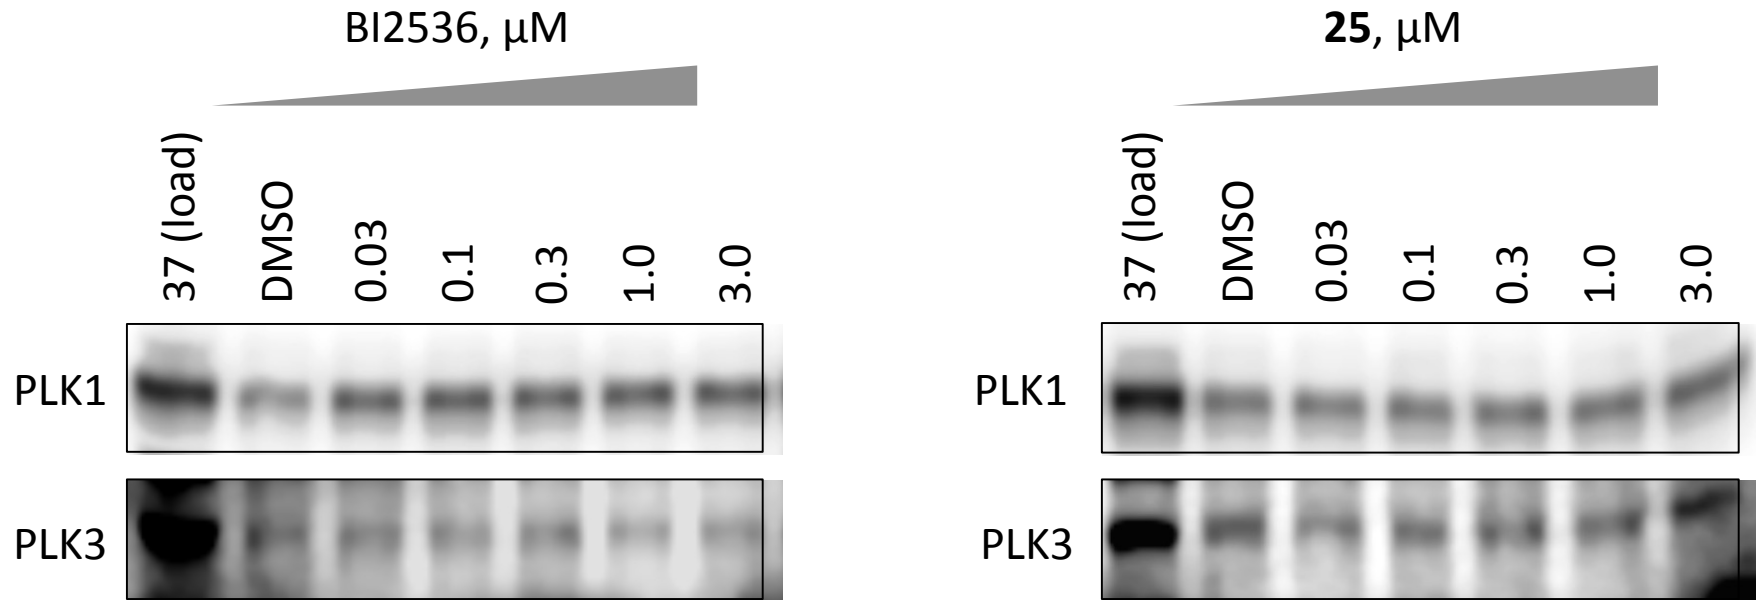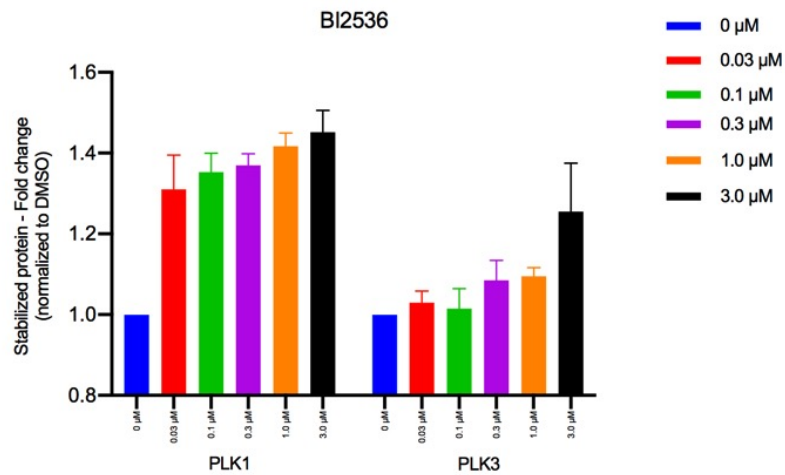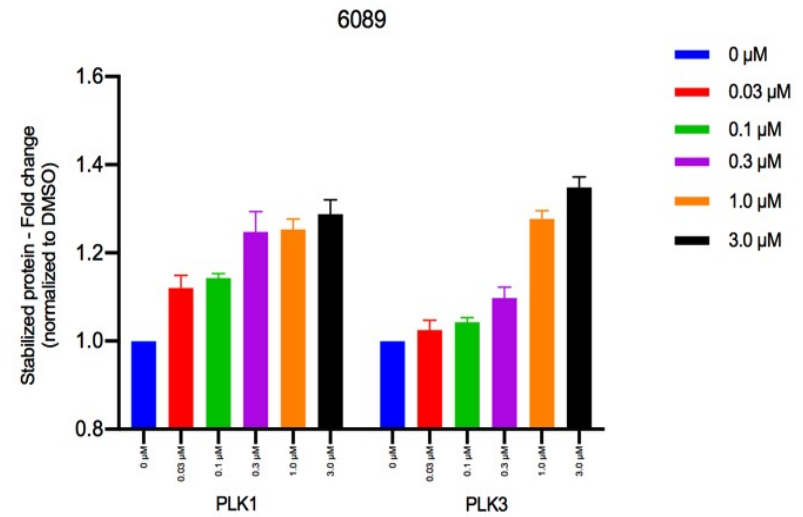

**Supplemental Figure 4.** CETSA EC50 Values for treatment of PC3 cells with PLK1 Inhibitors

# Dose-dependent engagement of PLK1 inhibitors

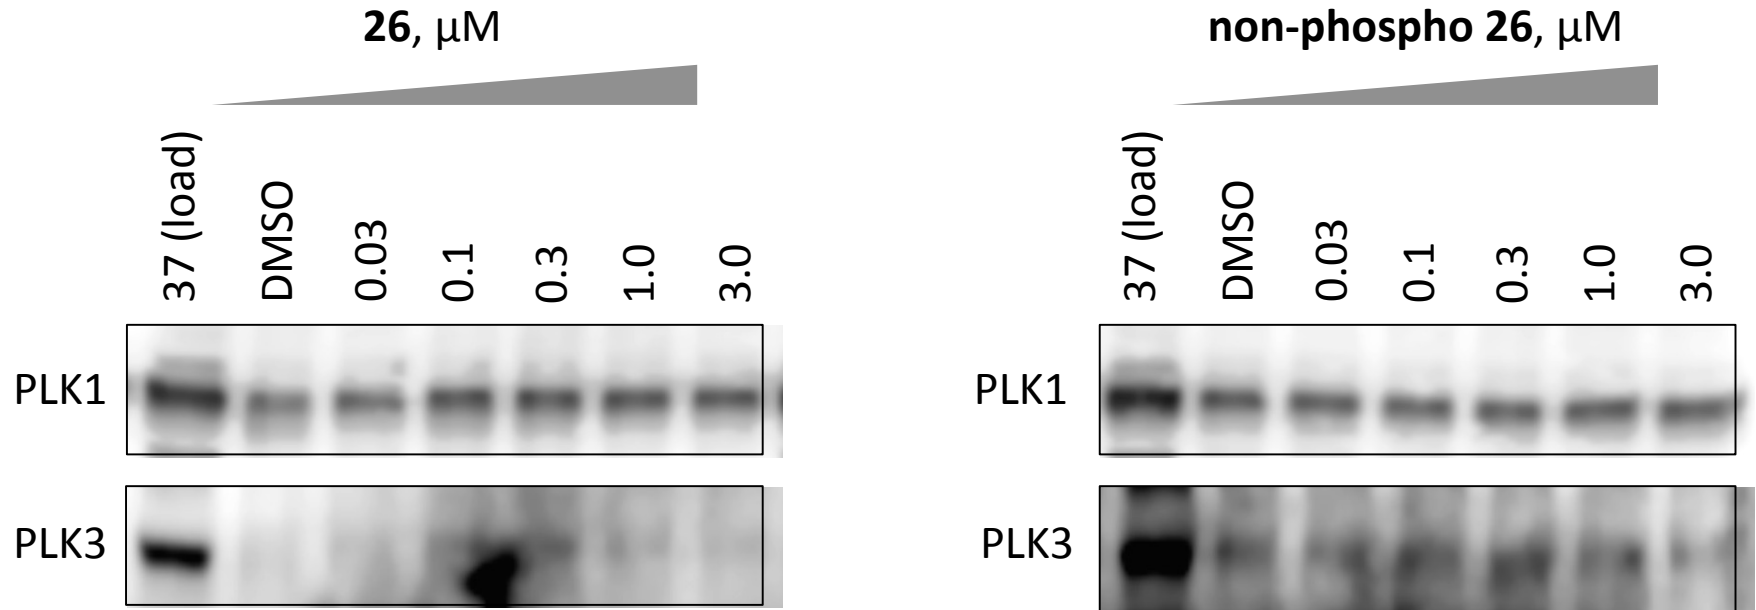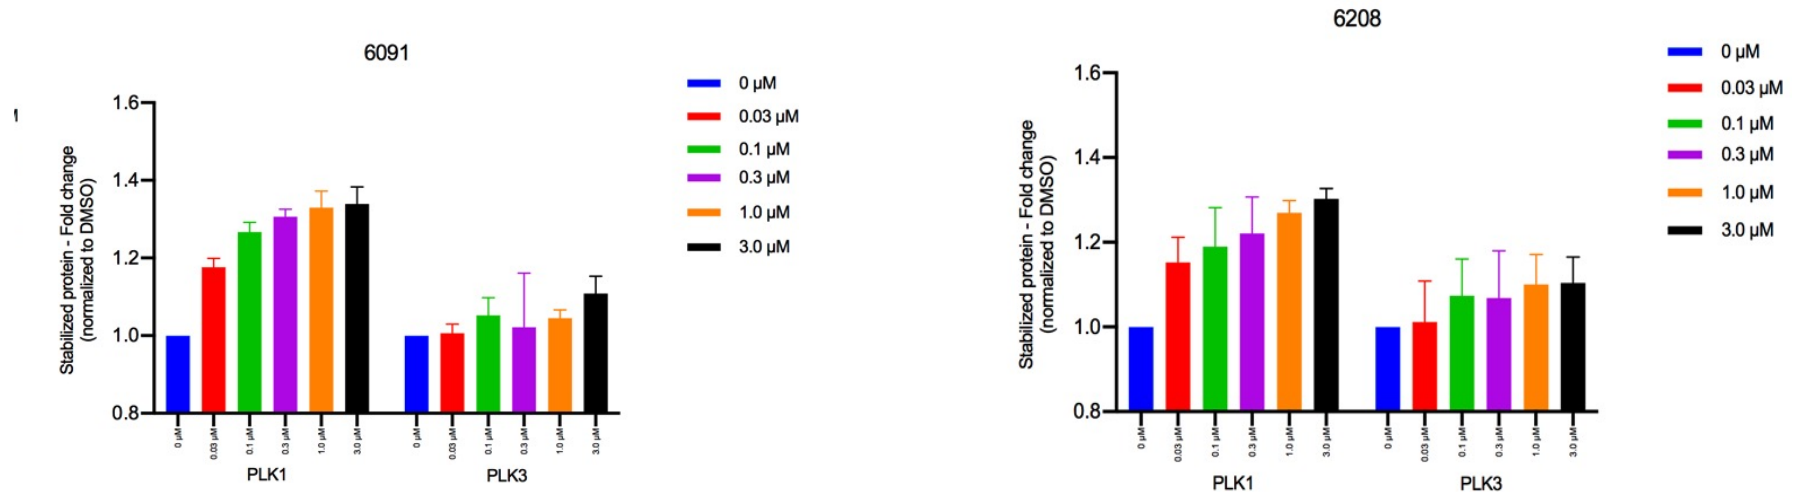

**Supplemental Figure 5. CETSA EC50 Values for treatment of PC3 cells with PLK1 Inhibitors**

### Inhibitors: Engagement with PLK1 at 56.2 °C

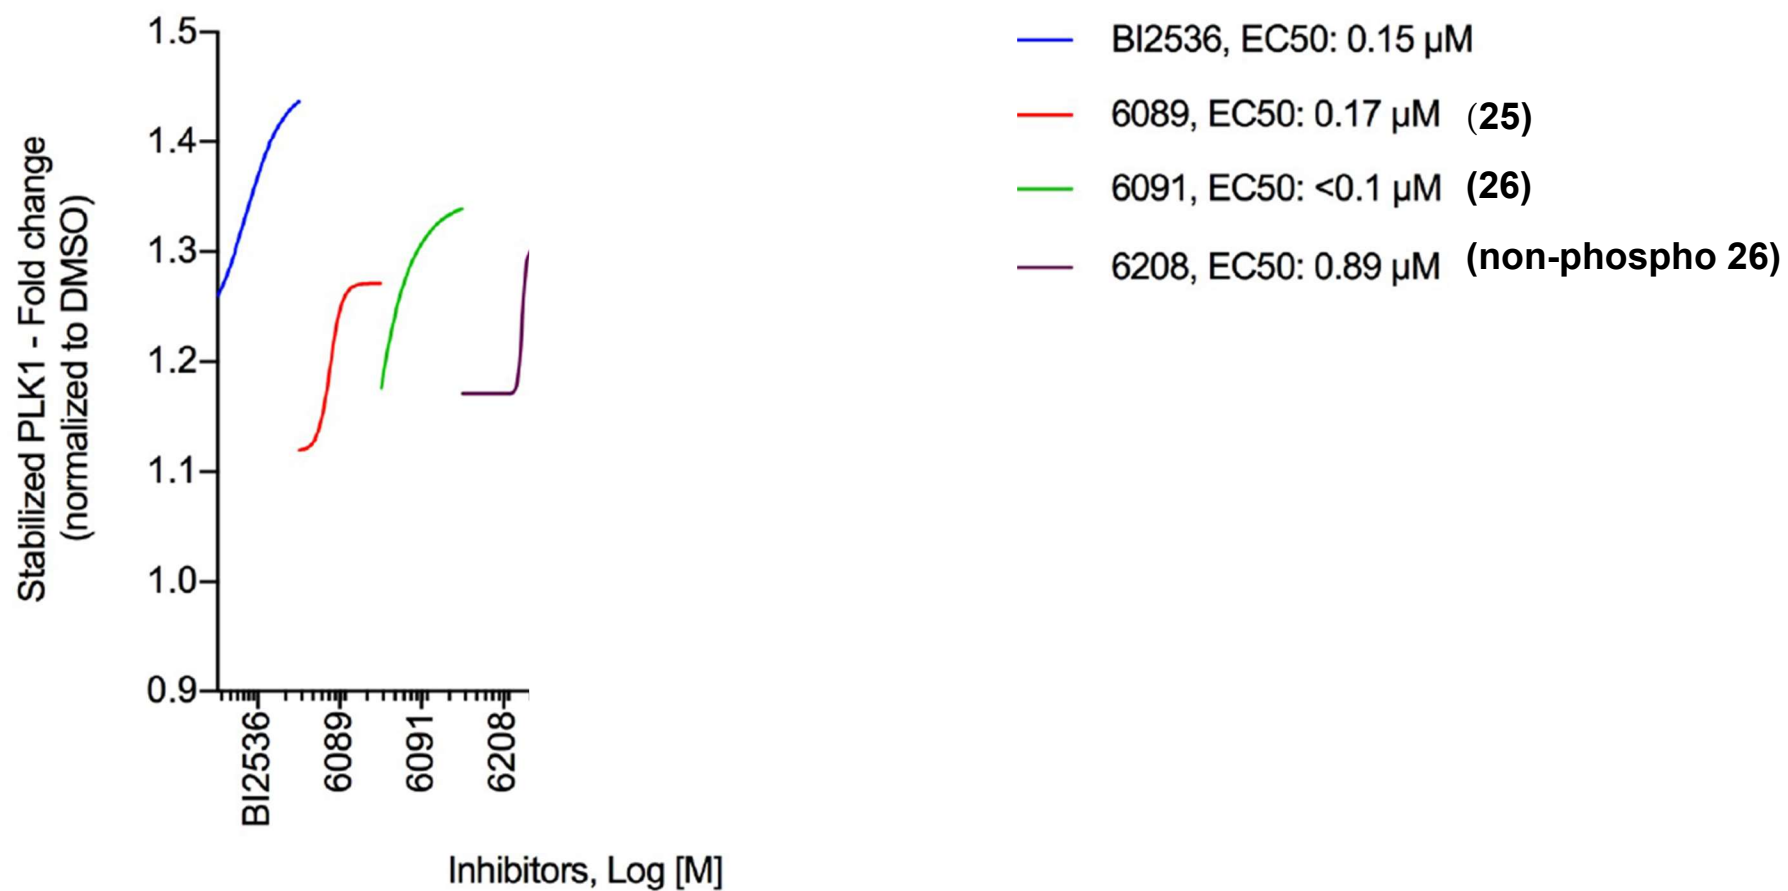

Dose-dependent saturation of inhibitors indicate target selectivity.  
Maximum stabilized target levels indicate potency.

**Supplemental Figure 6.** CETSA EC50 Curves for PLK1

### Inhibitors: Engagement with PLK3 at 48.0 °C

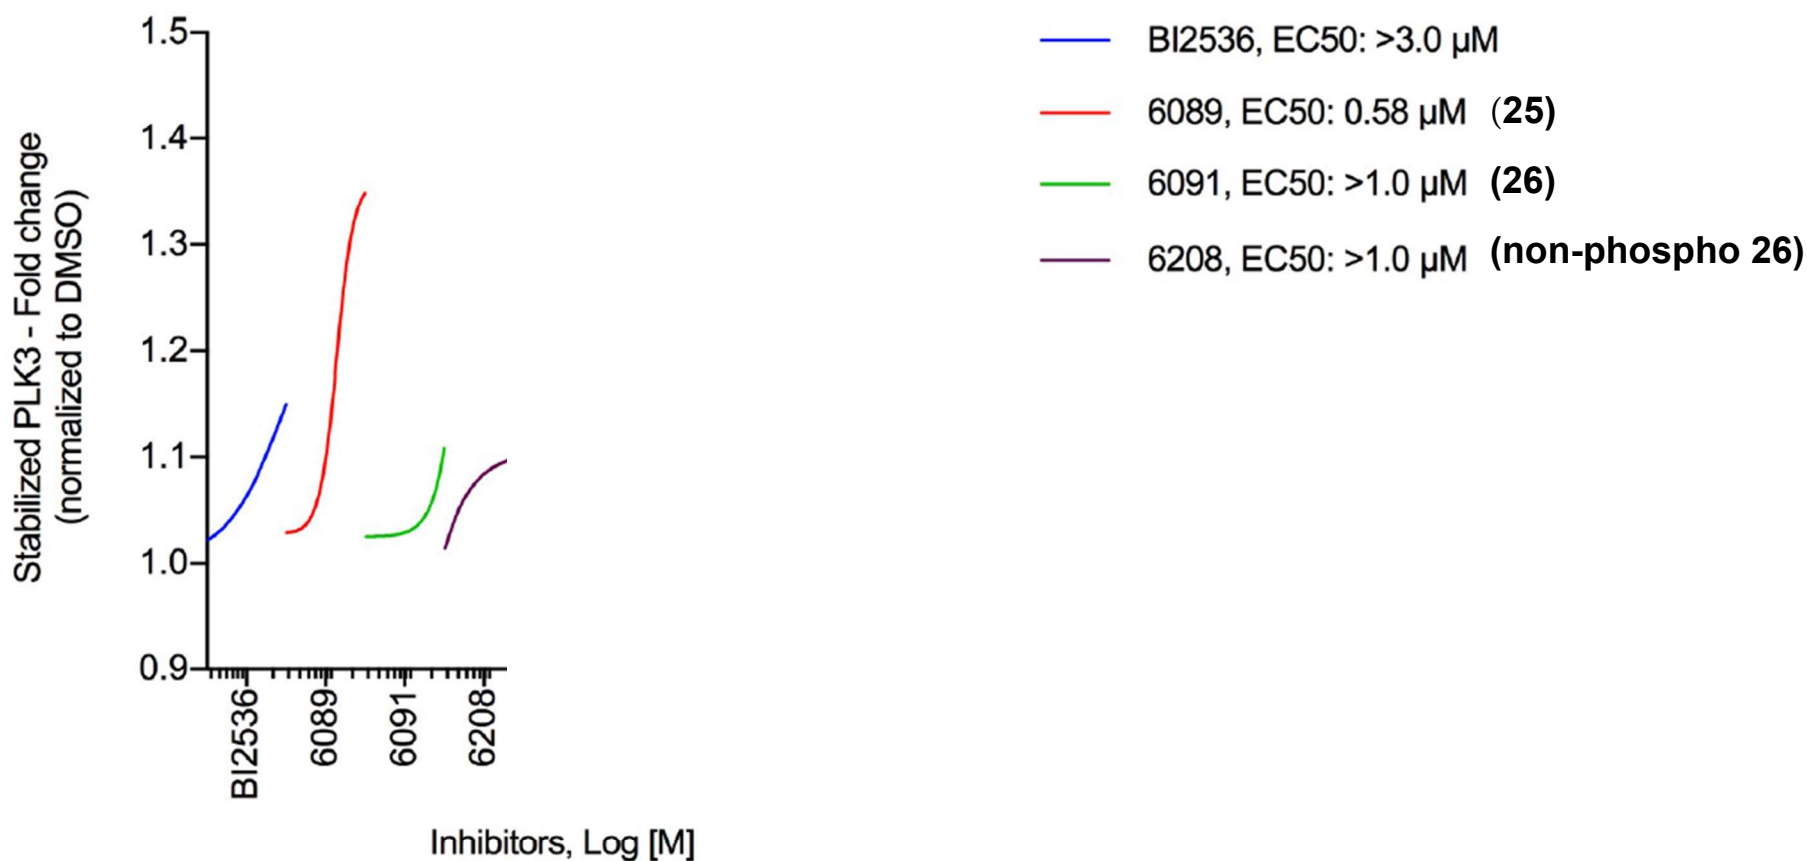

Dose-dependent saturation of inhibitors indicate target selectivity.  
Maximum stabilized target levels indicate potency.

**Supplemental Figure 7. CETSA EC50 Curves for PLK3**

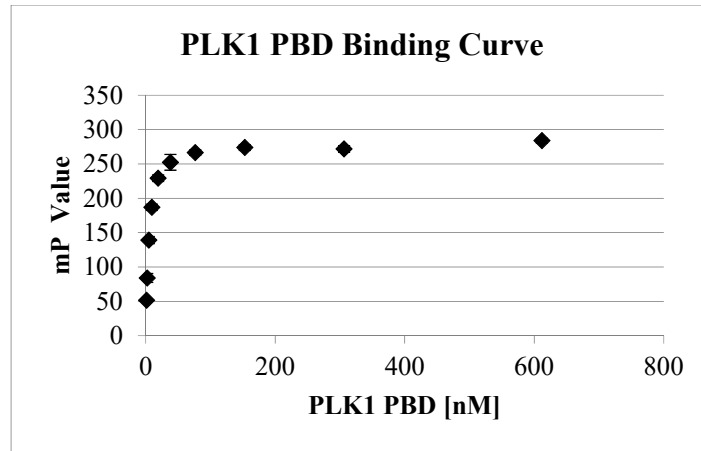

**Supplemental Figure 8.** PLK1 PBD dilution curve. The dissociation constant ( $K_d = 4.6$  nM) and the EC90 (41.1 nM) was determined from the curve.

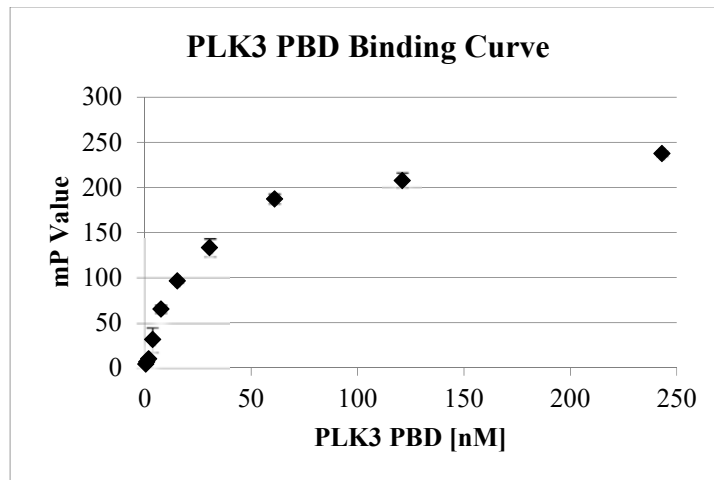

**Supplemental Figure 9.** PLK3 PBD dilution curve. The dissociation constant ( $K_d = 27.2$  nM) and the EC90 (245 nM) was determined from the curve.

NOTE: The EC90 for the tracer-PBD interaction is calculated then used in all subsequent experiments so that the polarization value is achieved that provides the highest signal to noise ratio. Displacement of the tracer from the PBD by increasing concentration of peptide or FLIP queried then reduces the polarization value. The IC50 values of compounds binding to the tracer is therefore not a direct  $K_d$  measurement, but a reflection of competition with the tracer and a relative affinity.



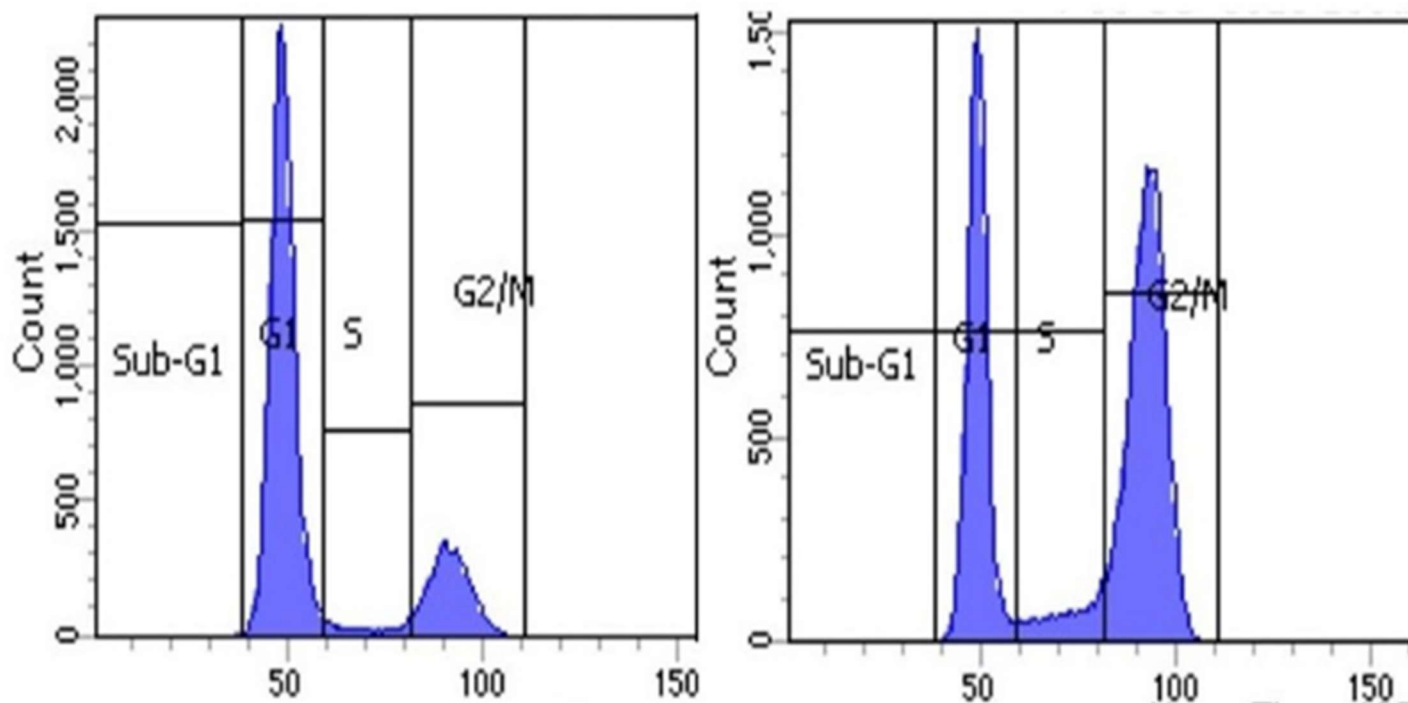

**Supplemental Figure 10.** Figure 3. Cell cycle analysis of PC3 cells following 24-hour treatment with **24**. Cells were synchronized by serum starvation for 72 hours prior to treatment. Untreated cells were serum starved then released into drug free media for 24 hours (left panel) or treated with 200  $\mu$ M **24** for 24 hours.

Supplementary Table 1. Analytical Data for PBD Binding Peptides

|    | Purity (%) | Column Dimensions | Method                               | FlowRate | Retention Time | Theoretical MW | Observed MW |
|----|------------|-------------------|--------------------------------------|----------|----------------|----------------|-------------|
| 1  | 91.9       | 4.6 × 250 nm      | 5-65% acetonitrile/water/0.1%TFA     | 1ml/min  | 14.6           | 997.1          | 996.7       |
| 2  | 98.1       | 4.6 × 250 nm      | 15-75% acetonitrile/water/0.1%TFA    | 1ml/min  | 17.1           | 917.1          | 917.6       |
| 3  | 99         | 4.6 × 250 nm      | 5-65% acetonitrile/water/0.1%TFA     | 1ml/min  | 16.1           | 1057.1         | 1056.3      |
| 4  | 97.2       | 4.6 × 250 nm      | 5-65% acetonitrile/water/0.1%TFA     | 1ml/min  | 14.9           | 859.9          | 859.5       |
| 5  | 90         | 4.6 × 250 nm      | 5-65% acetonitrile/water/0.1%TFA     | 1ml/min  | 14.4           | 762.8          | 762.5       |
| 6  | 95.5       | 4.6 × 250 nm      | 5-65% acetonitrile/water/0.1%TFA     | 1ml/min  | 12.2           | 745.7          | 746.4       |
| 7  | 97.5       | 4.6 × 250 nm      | 5-65% acetonitrile/water/0.1%TFA     | 1ml/min  | 11.7           | 1122.1         | 1122.1      |
| 8  | 90         | 4.6 × 250 nm      | 5-65% acetonitrile/water/0.1%TFA     | 1ml/min  | 14.7           | 1107.1         | 1106.6      |
| 9  | 99.3       | 4.6 × 250 nm      | 5-65% acetonitrile/water/0.1%TFA     | 1ml/min  | 12.4           | 1072.1         | 1073.2      |
| 10 | 90.8       | 4.6 × 250 nm      | 5-65% acetonitrile/water/0.1%TFA     | 1ml/min  | 13.4           | 787.6          | 787.4       |
| 11 | 98.9       | 4.6 × 250 nm      | 5-65% acetonitrile/water/0.1%TFA     | 1ml/min  | 15.2           | 801.6          | 801.5       |
| 12 | 91.5       | 4.6 × 250 nm      | 5-65% acetonitrile/water/0.1%TFA     | 1ml/min  | 16.9           | 815.6          | 815.4       |
| 13 | 90.1       | 4.6 × 250 nm      | 15-75% acetonitrile/water/0.1%TFA    | 1ml/min  | 16.5           | 829.6          | 829.4       |
| 14 | 94.9       | 4.6 × 250 nm      | 5-65% acetonitrile/water/0.1%TFA     | 1ml/min  | 21.8           | 895.0          | 895.4       |
| 15 | 96.5       | 4.6 × 250 nm      | 5-65% acetonitrile/water/0.1%TFA     | 1ml/min  | 21.3           | 891.0          | 891.5       |
| 16 | 98.8       | 4.6 × 250 nm      | 5-65% acetonitrile/water/0.1%TFA     | 1ml/min  | 19.2           | 817.6          | 817.3       |
| 17 | 95         | 4.6 × 250 nm      | 5-65% acetonitrile/water/0.1%TFA     | 1ml/min  | 13.3           | 800.6          | 800.4       |
| 18 | 95.3       | 4.6 × 250 nm      | 5-65% acetonitrile/water/0.1%TFA     | 1ml/min  | 17.2           | 829.0          | 828.5       |
| 19 | 97.9       | 4.6 × 250 nm      | 5-65% acetonitrile/water/0.1%TFA     | 1ml/min  | 21.3           | 827.8          | 828.4       |
| 20 | 98.8       | 4.6 × 250 nm      | 5-65% acetonitrile/water/0.1%TFA     | 1ml/min  | 24.6           | 855.6          | 855.8       |
| 21 | 91         | 4.6 × 250 nm      | 5-65% acetonitrile/water/0.1%TFA     | 1ml/min  | 26.9           | 883.6          | 883.5       |
| 22 | 94.3       | 4.6 × 250 nm      | 5-65% acetonitrile/water/0.1%TFA     | 1ml/min  | 27.2           | 573.3          | 573.2       |
| 23 | 96.1       | 4.6 × 250 nm      | 5-65% acetonitrile/water/0.1%TFA     | 1ml/min  | 8.2            | 686.4          | 686.4       |
| 24 | 91.3       | 4.6 × 250 nm      | 35-95% acetonitrile/water/0.1%TFA    | 1ml/min  | 17.0           | 712.8          | 712.3       |
| 25 | 100        | 4.6 × 250 nm      | 5-95% acetonitrile/water             | 1ml/min  | 15.9           | 685.8          | 686.0       |
| 26 | 98.2       | 4.6 × 250 nm      | 5-95% acetonitrile/water             | 1ml/min  | 16.9           | 699.8          | 700.0       |
| 27 | 95.3       | 4.6 × 250 nm      | 40-100% acetonitrile/water/0.05% TFA | 1ml/min  | 15.6           | 619.8          | 619.4       |

Supplementary Table 2. MTT assay results for WT and C67V Retinal Pigment Epithelial Cells.

| Compound ID#      | WT PLK1 RPE Cells<br><br>IC <sub>50</sub> [μM] | C67V RPE Cells<br><br>IC <sub>50</sub> [μM] |
|-------------------|------------------------------------------------|---------------------------------------------|
| BI-2536 (control) | 0.021                                          | >2.5                                        |
| 23                | 298.6                                          | 136.8                                       |
| 24                | 158.5 ± 8.8                                    | 86.8 ± 33.8                                 |
